# Supplementary material
Source: MDPI journal article supplement (https://www.mdpi.com/2071-1050/13/13/7490)
Supplement: s1 [file s1]

**Table 1.** Toxicity classification system according to Persoone et al. [49]

| Class                  | I                                        | II                                                                                     | III                                                                                        | IV                                              | V                                       |
|------------------------|------------------------------------------|----------------------------------------------------------------------------------------|--------------------------------------------------------------------------------------------|-------------------------------------------------|-----------------------------------------|
| Threat degree          | NO ACUTE HAZARD                          | SLIGHT ACUTE HAZARD                                                                    | ACUTE HAZARD                                                                               | HIGH ACUTE HAZARD                               | VERY HIGH ACUTE HAZARD                  |
| Percentage effect (PE) | ≤20%                                     | 20% ≤ PE < 50%                                                                         | 50% ≤ PE < 100%                                                                            | 100%                                            | 100%                                    |
|                        | None of the bioassay show a toxic effect | A toxic effect is measured in at least one bioassay, but the effect level is below 50% | The PE is reached or exceeded in at least one bioassay, but the effect level is below 100% | The PE 100% is reached in at least one bioassay | The PE 100% is reached in all bioassays |
